# Supplementary material
Source: HighWire-hosted journal article supplement (https://www.annfammed.org/highwire/filestream/15126/field_highwire_adjunct_files/0/Huffstetler_Supp.pdf)
Supplement: Huffstetler_Supp.pdf [file Huffstetler_Supp.pdf]

Supplemental materials for:

Huffstetler AN, Sabo RT, Lavallee M, et al. Using a state's all-payer claims data to accurately identify the active primary care workforce: a novel study in Virginia. *Ann Fam Med*. 2022;20(5):446-451.

Supplemental Table 1. NUCC Classification Categories

| Category                | NUCC Classification                                                                                                                                                                                                                                                                                                                                                                                                                                                                                                                                                                                                                                                                                      |
|-------------------------|----------------------------------------------------------------------------------------------------------------------------------------------------------------------------------------------------------------------------------------------------------------------------------------------------------------------------------------------------------------------------------------------------------------------------------------------------------------------------------------------------------------------------------------------------------------------------------------------------------------------------------------------------------------------------------------------------------|
| Family Medicine         | Family Medicine                                                                                                                                                                                                                                                                                                                                                                                                                                                                                                                                                                                                                                                                                          |
| Pediatrics              | Pediatrics                                                                                                                                                                                                                                                                                                                                                                                                                                                                                                                                                                                                                                                                                               |
| Internal Medicine       | Internal Medicine and General Practice                                                                                                                                                                                                                                                                                                                                                                                                                                                                                                                                                                                                                                                                   |
| Obstetrics & Gynecology | Obstetrics & Gynecology                                                                                                                                                                                                                                                                                                                                                                                                                                                                                                                                                                                                                                                                                  |
| Specialist              | All Other remaining Specialties for Allopathic and Osteopathic Physicians:<br><br>Allergy & Immunology, Anesthesiology, Dermatology, Emergency Medicine, Hospitalist, Neuromusculoskeletal Medicine & OMM, Otolaryngology, Pain Medicine, Physical Medicine & Rehabilitation, Preventive Medicine, Psychiatry & Neurology, Radiology, Surgery, Colon & Rectal Surgery, Independent Medical Examiner, Medical Genetics, Neuromusculoskeletal Medicine, Sports Medicine, Nuclear Medicine, Ophthalmology, Oral & Maxillofacial Surgery, Orthopaedic Surgery, Pathology, Plastic Surgery, Thoracic Surgery (Cardiothoracic Vascular Surgery), Transplant Surgery, Urology, Neurological Surgery, Phlebology |

Supplemental Table 2. Taxonomy codes

| Classification          | Taxonomy Codes                                                                                                          |
|-------------------------|-------------------------------------------------------------------------------------------------------------------------|
| Primary Care            | "207Q00000X", "207QA0000X",<br>"207QA0505X", "207QG0300X",<br>"207R00000X", "207RA0000X",<br>"207RG0300X", "208D00000X" |
| Primary Care Specialist | "207QS0010X", "207QS1201X", "207QH0002X",<br>"207QB0002X", "207RB0002X", "207RS0010X",<br>"2080S0010X", "2083S0010X"    |
| Pediatrics Primary Care | "208000000X", "2080A0000X"                                                                                              |
| OBGYN                   | "207V00000X", "207VG0400X", "207VX0000X"                                                                                |
| OBGYN Specialist        | "207VE0102X", "207VM0101X", "207VC0200X",<br>"207VX0201X"                                                               |

Supplemental Table 3. Procedure Codes for Wellness Visits

| Category           | Vocabulary | Procedure Code | Description                                                                        |
|--------------------|------------|----------------|------------------------------------------------------------------------------------|
| Adult Wellness     | CPT4       | 99385          | Initial new patient preventative medicine evaluation age 18-39 years               |
|                    | CPT4       | 99386          | Initial new patient preventative medicine evaluation age 40-64 years               |
|                    | CPT4       | 99387          | Initial new patient preventative medicine evaluation age 65 years or older         |
|                    | CPT4       | 99395          | Established patient periodic preventive medicine examination age 18-39 years       |
|                    | CPT4       | 99396          | Established patient periodic preventive medicine examination age 40-64 years       |
|                    | CPT4       | 99397          | Established patient periodic preventive medicine examination age 65 years or older |
|                    | HCSPS      | G0402          | Initial preventive exam                                                            |
|                    | HCSPS      | G0438          | Annual wellness visit; initial visit                                               |
|                    | HCSPS      | G0439          | Annual wellness visit; subsequent visit                                            |
| Pediatric Wellness | CPT4       | 99381          | Initial new patient preventative medicine evaluation age less than 1 year          |
|                    | CPT4       | 99382          | Initial new patient preventative medicine evaluation age 1-4 years                 |
|                    | CPT4       | 99383          | Initial new patient preventative medicine evaluation age 5-11 years                |
|                    | CPT4       | 99384          | Initial new patient preventative medicine evaluation age 12-17 years               |
|                    | CPT4       | 99391          | Established patient periodic preventive medicine examination age less than 1 year  |
|                    | CPT4       | 99392          | Established patient periodic preventive medicine examination age 1-4 years         |
|                    | CPT4       | 99393          | Established patient periodic preventive medicine examination age 5-11 years        |
|                    | CPT4       | 99394          | Established patient periodic preventive medicine examination age 12-17 years       |

Supplemental Table 4: Physician continuity of wellness function from year to year.

| yr        | all   | pcp   | fm    | im    | ob    | ped   | spec  |
|-----------|-------|-------|-------|-------|-------|-------|-------|
| 2015-2016 | 84.41 | 85.98 | 85.45 | 84.26 | 85.97 | 90.87 | 56.52 |
| 2016-2017 | 84.75 | 85.54 | 84.71 | 85.75 | 86.92 | 89.31 | 35.19 |
| 2017-2018 | 84.05 | 85.73 | 83.78 | 86.82 | 87.32 | 90.07 | 63.89 |
| 2018-2019 | 84.18 | 85.21 | 83.01 | 86.39 | 87.00 | 90.66 | 55.56 |
